# Supplementary material for: Green synthesis of silver nanoparticles using Phyllanthus emblica extract: investigation of antibacterial activity and biocompatibility in vivo
Source: Royal Society of Chemistry journal article supplement (doi:10.1039/d3pm00077j), 2024-01-01
Supplement: d3pm00077j1.pdf [file d3pm00077j1.pdf]

## Supporting Information

# Green Synthesis of Silver Nanoparticles using *Phyllanthus emblica* Extract: Investigation of Antibacterial Activity and Biocompatibility *in vivo*

Md Monir Hossain,<sup>#a</sup> Amir Hamza,<sup>#a</sup> Shakil Ahmed Polash,<sup>a,b</sup> Mehedi Hasan Tushar,<sup>a</sup> Masato Takikawa,<sup>c</sup> Anuj Bhowmik Piash,<sup>a</sup> Chaitali Dekiwadia,<sup>d</sup> Tanushree Saha,<sup>e,f</sup> Shinji Takeoka,<sup>g</sup> Satya Ranjan Sarker <sup>\*a</sup>

<sup>a</sup>*Department of Biotechnology and Genetic Engineering, Jahangirnagar University, Savar, Dhaka - 1342, Bangladesh*

<sup>b</sup>*NanoBiotechnology Research Laboratory (NBRL), School of Science, RMIT University, Melbourne, Victoria 3001, Australia*

<sup>c</sup>*Department of Advanced Science and Engineering, Waseda University (TWIns), Shinjuku-ku, Tokyo 162-8480, Japan*

<sup>d</sup>*RMIT Microscopy and Microanalysis Facility, RMIT University, Melbourne 3001, Victoria, Australia*

<sup>e</sup>*School of Engineering, RMIT University, Melbourne 3001, Victoria, Australia*

<sup>f</sup>*Department of Textile Engineering, Dhaka University of Engineering and Technology, Gazipur 1700, Bangladesh*

<sup>g</sup>*Department of Life Science and Medical Bioscience, Graduate School of Advanced Science and Engineering, Waseda University (TWIns), Shinjuku-ku, Tokyo 162-8480, Japan*

*# Contributed equally*

**\*Corresponding author:**

Email: [satya.sarker@bgeju.edu.bd](mailto:satya.sarker@bgeju.edu.bd)

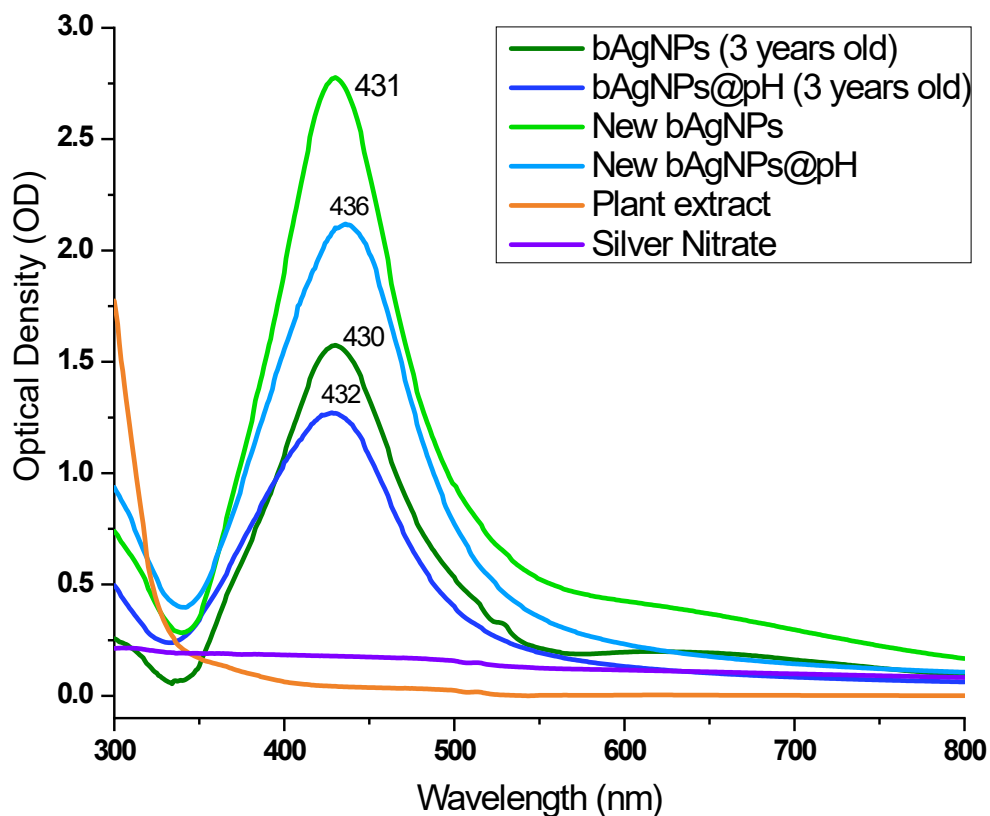

**FIGURE S1** | Observation of nanoparticles stability. Ultraviolet-visible spectra of silver nanoparticles synthesized using *Phyllanthus emblica* flesh extract. High-intensity surface plasmon resonance bands are visible at 431 and 436 nm for newly synthesized bAgNPs (without controlled pH) and bAgNPs@pH (controlled pH), respectively. The high-intensity surface plasmon resonance bands for previously (i.e., 3 years ago) synthesized bAgNPs (without controlled pH) and bAgNPs@pH (controlled pH) are also visible at 430 and 432 nm, respectively. There is no discernible differences in the absorption spectra of nanoparticles synthesized at different times, indicating that both the as-synthesized bAgNPs and bAgNPs@pH are highly stable.

**TABLE S1.** Hydrodynamic Size, Polydispersity index (PDI), Zeta potentials of biogenic AgNPs

| Biogenic AgNPs | Hydrodynamic Size (nm) | PDI   | Zeta potential (mV) |
|----------------|------------------------|-------|---------------------|
| bAgNPs@pH      | 116.8 ± 72.9 (86.1%)   | 0.566 | -24.4 ± 2.2         |
|                | 13.2 ± 4.7 (13.9%)     |       |                     |
| bAgNPs         | 366.4 ± 148.2 (93.2%)  | 0.214 | -24.2 ± 0.9         |
|                | 94.7 ± 17.2 (6.7%)     |       |                     |

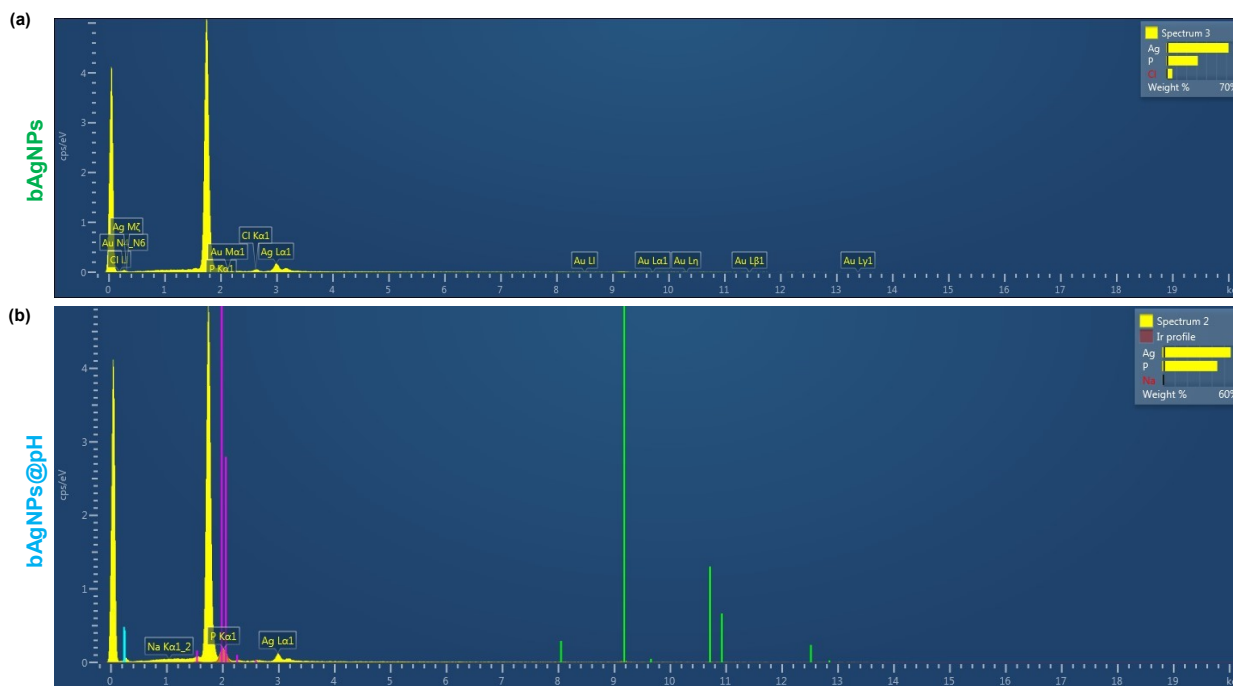

**FIGURE S2 |** Energy dispersive X-ray (EDS) spectra of bAgNPs **(a)**, and bAgNPs@pH **(b)**. Peaks at ~3 keV indicate the presence of Ag in the biogenic nanoparticles.

**TABLE S2.** Antibacterial Activity (*i.e.*, MIC Values and the ZOI) of bAgNPs

| Name of strains                       | Zone of inhibition (mm) |                        |                                       |                   | MIC (( $\mu$ g) |            | Pathogenicity |
|---------------------------------------|-------------------------|------------------------|---------------------------------------|-------------------|-----------------|------------|---------------|
|                                       | bAgNPs (60 $\mu$ g)     | bAgNPs@pH (60 $\mu$ g) | Ethanollic plant extract (60 $\mu$ g) | AgNO <sub>3</sub> | bAgNPs          | bAgNPs @pH |               |
| <i>B. subtilis</i>                    | 13 $\pm$ 1              | 14.67 $\pm$ 0.25       | 6.33 $\pm$ 0.58                       | 8.0 $\pm$ 0.0     | 0.50            | 0.50       | Nonpathogenic |
| <i>S. typhi</i>                       | 15.67 $\pm$ 0.30        | 15.33 $\pm$ 0.58       | 7.0 $\pm$ 0                           | 7.0 $\pm$ 0.55    | 0.50            | 0.50       | Pathogenic    |
| <i>H. Alvei</i>                       | 23.67 $\pm$ 0.58        | 25.67 $\pm$ 0.58       | 10.33 $\pm$ 0.5                       | 7.0 $\pm$ 0.0     | 0.25            | 0.25       | Pathogenic    |
| <i>EPEC</i>                           | 18.33 $\pm$ 0.58        | 20 $\pm$ 1             | 9.33 $\pm$ 0.58                       | 7.0 $\pm$ 0.0     | 0.25            | 0.25       | Pathogenic    |
| <i>E. coli DH5<math>\alpha</math></i> | 13.67 $\pm$ 0.58        | 15 $\pm$ 1             | 6.67 $\pm$ 0.58                       | 9.0 $\pm$ 0.33    | 0.50            | 0.50       | Nonpathogenic |
| <i>V. cholerae</i>                    | 18.33 $\pm$ 0.58        | 20.33 $\pm$ 0.58       | 7.5 $\pm$ 0.58                        | 8.5 $\pm$ 0.0     | 0.25            | 0.25       | Pathogenic    |
| <i>S. aureus</i>                      | 17 $\pm$ 1              | 22.25 $\pm$ 0.75       | 9.67 $\pm$ 0.58                       | 9.0 $\pm$ 0.0     | 0.50            | 0.125      | Pathogenic    |

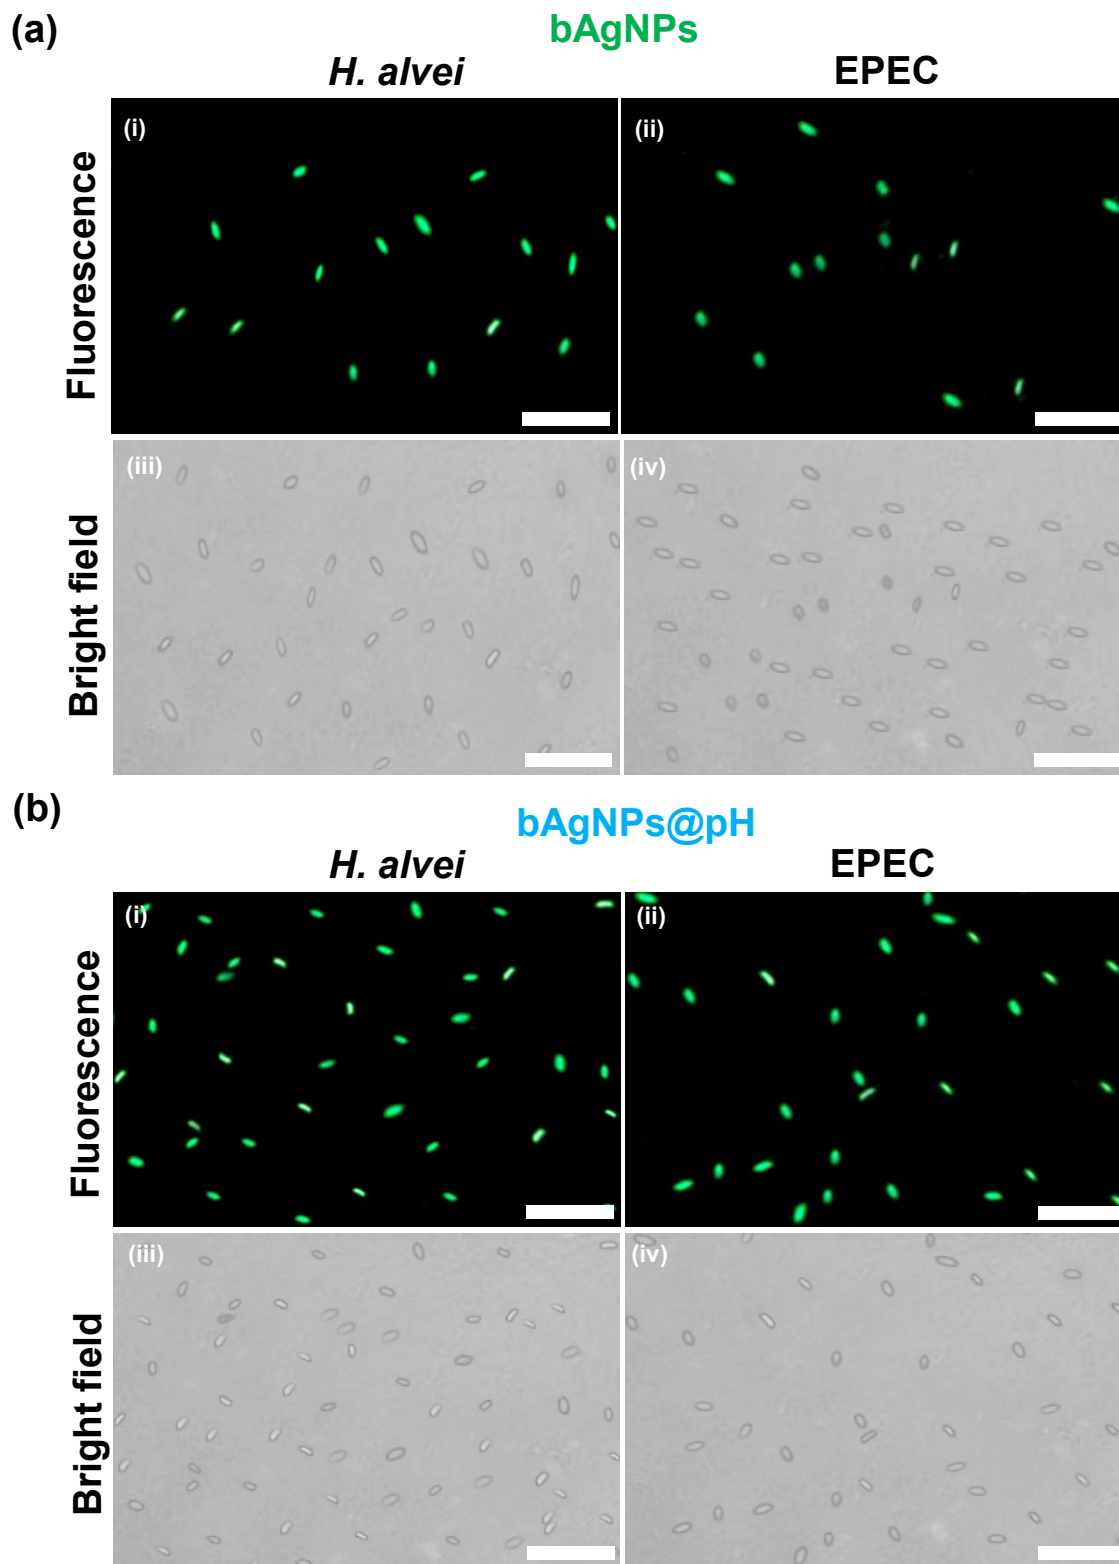

**FIGURE S3** | (a) CellTox Green assay shows that bAgNPs bring about bacterial [*H. alvei* (i) and EPEC (ii)] cell wall damage. Figure (iii) and (iv) are bright field images of them, respectively. (b)

CellTox Green assay shows that bAgNPs@pH bring about bacterial [*H. alvei* (i) and EPEC (ii)] cell wall damage. Figure (iii) and (iv) are bright field images of them, respectively. Scale bar: 20  $\mu\text{m}$ .

**Table S3:** Zone of inhibition (mm) in different doses of nanoparticles and at different time points

| Name of Bacteria         | bAgNPs |                  |                  | bAgNPs@pH |                  |                  | Plant extract 60 $\mu\text{g}$ |
|--------------------------|--------|------------------|------------------|-----------|------------------|------------------|--------------------------------|
|                          | Hours  | 30 $\mu\text{g}$ | 60 $\mu\text{g}$ | Hours     | 30 $\mu\text{g}$ | 60 $\mu\text{g}$ |                                |
| <i>Bacillus subtilis</i> | 16     | 12.5 $\pm$ 0.58  | 13 $\pm$ 1       | 16        | 12.67 $\pm$ 0.58 | 14.67 $\pm$ 0.25 | 6.33 $\pm$ 0.58                |
|                          | 20     | 11.33 $\pm$ 0.58 | 12 $\pm$ 1       | 20        | 12.25 $\pm$ 0.25 | 14 $\pm$ 1       | 6.67 $\pm$ 0.25                |
|                          | 24     | 10.25 $\pm$ 1.25 | 11 $\pm$ 1       | 24        | 11 $\pm$ 1       | 12 $\pm$ 1       | 6.33 $\pm$ 0.58                |
| <i>E. coli (DH5a)</i>    | 16     | 12.33 $\pm$ 0.58 | 13.67 $\pm$ 0.58 | 16        | 13.67 $\pm$ 0.58 | 15 $\pm$ 1       | 6.67 $\pm$ 0.58                |
|                          | 20     | 11.67 $\pm$ 0.58 | 13.33 $\pm$ 0.58 | 20        | 13.00 $\pm$ 0.25 | 14.33 $\pm$ 0.58 | 6.33 $\pm$ 0.58                |
|                          | 24     | 10.33 $\pm$ 0.58 | 11 $\pm$ 1       | 24        | 10.67 $\pm$ 0.58 | 11.67 $\pm$ 0.58 | 6.0 $\pm$ 0.58                 |
| <i>V. cholera</i>        | 16     | 16.67 $\pm$ 1.15 | 18.33 $\pm$ 0.58 | 16        | 19 $\pm$ 1       | 20.33 $\pm$ 0.58 | 7.5 $\pm$ 0.58                 |
|                          | 20     | 15.67 $\pm$ 0.58 | 15.33 $\pm$ 0.58 | 20        | 17.33 $\pm$ 0.58 | 18.0 $\pm$ 0.58  | 7.0 $\pm$ 0.58                 |
|                          | 24     | 13.33 $\pm$ 0.58 | 12.67 $\pm$ 0.58 | 24        | 15.33 $\pm$ 0.58 | 16.33 $\pm$ 0.58 | 7.0 $\pm$ 0.58                 |
| <i>S. aureus</i>         | 16     | 14.75 $\pm$ 0.75 | 17 $\pm$ 1       | 16        | 21.5 $\pm$ 0.5   | 22.25 $\pm$ 0.75 | 9.67 $\pm$ 0.58                |
|                          | 20     | 14 $\pm$ 1       | 15.75 $\pm$ 1.25 | 20        | 16.5 $\pm$ 1.5   | 17.75 $\pm$ 0.25 | 9.33 $\pm$ 0.25                |
|                          | 24     | 8.5 $\pm$ 0.5    | 11.75 $\pm$ 0.25 | 24        | 10.5 $\pm$ 0.5   | 11.75 $\pm$ 0.25 | 8.67 $\pm$ 0.58                |
| <i>Salmonella typhi</i>  | 16     | 13.67 $\pm$ 0.58 | 15.67 $\pm$ 0.58 | 16        | 13.33 $\pm$ 0.58 | 15.33 $\pm$ 0.58 | 7.0 $\pm$ 0                    |
|                          | 20     | 12.33 $\pm$ 0.58 | 14.67 $\pm$ 0.58 | 20        | 12.33 $\pm$ 0.58 | 14.33 $\pm$ 0.58 | 7.0 $\pm$ 0                    |
|                          | 24     | 10.33 $\pm$ 0.58 | 13 $\pm$ 1.73    | 24        | 10 $\pm$ 1       | 11.67 $\pm$ 1.15 | 6.33 $\pm$ 0.58                |
| <i>Hafnia alvei</i>      | 16     | 22 $\pm$ 1       | 23.67 $\pm$ 0.58 | 16        | 22 $\pm$ 1       | 25.67 $\pm$ 0.58 | 10.33 $\pm$ 0.5                |
|                          | 20     | 21.67 $\pm$ 0.58 | 22.33 $\pm$ 0.58 | 20        | 21.33 $\pm$ 0.58 | 24 $\pm$ 1       | 10.0 $\pm$ 0                   |
|                          | 24     | 18.33 $\pm$ 0.58 | 19.33 $\pm$ 0.58 | 24        | 18 $\pm$ 1       | 19.67 $\pm$ 0.58 | 8.67 $\pm$ 0.58                |
| <i>E. coli (EPEC)</i>    | 16     | 17 $\pm$ 0.58    | 18.33 $\pm$ 0.58 | 16        | 17.67 $\pm$ 0.58 | 20 $\pm$ 1       | 9.33 $\pm$ 0.58                |
|                          | 20     | 16.67 $\pm$ 0.58 | 17.33 $\pm$ 0.58 | 20        | 16.33 $\pm$ 0.58 | 19.33 $\pm$ 0.58 | 9.0 $\pm$ 0.58                 |
|                          | 24     | 14.33 $\pm$ 0.58 | 14.67 $\pm$ 0.58 | 24        | 14 $\pm$ 1       | 15.67 $\pm$ 0.58 | 8.67 $\pm$ 0.58                |

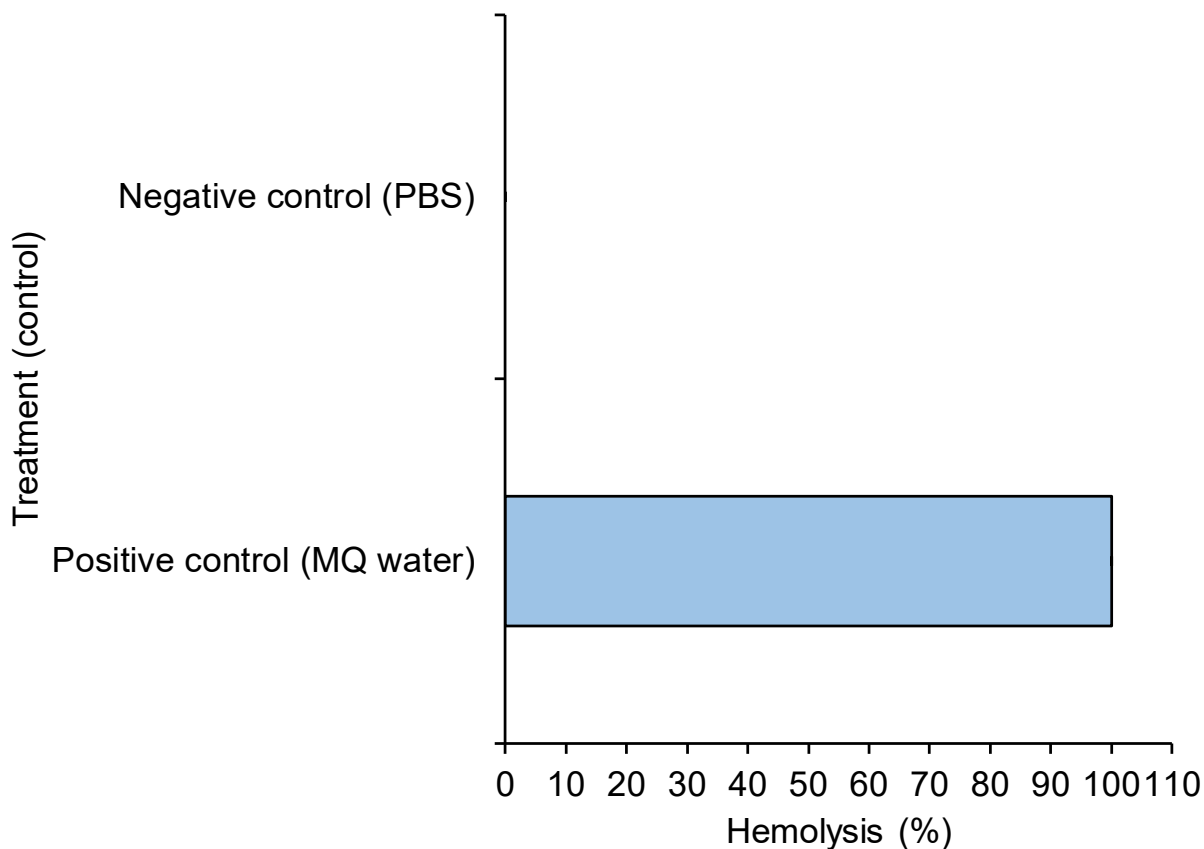

**FIGURE S4** | Control experiment for hemolysis was performed using Mili Q water (MQ) as positive control, Phosphate buffer saline (PBS) as negative control.

**Table S4:** Zone of inhibition of standard drugs used for the antibacterial assays at 16 hours.

| Name of Bacteria         | Povidone iodine |             | Ciprofloxacin |              |
|--------------------------|-----------------|-------------|---------------|--------------|
|                          | Hours           | 100 µg      | Hours         | 5 µg         |
| <i>Bacillus subtilis</i> | 16              | 12.5 ± 1.0  | 16            | 28.5 ± 1.0   |
| <i>E. coli (DH5α)</i>    | 16              | 13.5 ± 1.5  | 16            | 29 ± 0.5     |
| <i>V. cholera</i>        | 16              | 14.29 ± 0.5 | 16            | 30 ± 1.0     |
| <i>S. aureus</i>         | 16              | 15 ± 0.25   | 16            | 31.58 ± 0.25 |
| <i>Salmonella typhi</i>  | 16              | 14.5 ± 1.5  | 16            | 30.43 ± 0.75 |
| <i>Hafnia alvei</i>      | 16              | 15 ± 1.0    | 16            | 29 ± 1.0     |
| <i>E. coli (EPEC)</i>    | 16              | 12.5 ± 0.5  | 16            | 23 ± 0.50    |

**Table S5:** The normal reference range of liver and kidney function biomarker <sup>1</sup>.

| <b>Name of tests</b>                 | <b>Normal reference range of Wistar rat</b> |       |
|--------------------------------------|---------------------------------------------|-------|
| ALT (Alanine aminotrasferase)        | 13-56                                       | U/L   |
| AST (Aspartate aminotrasferase)      | 34-109                                      | U/L   |
| γ-GT (Gamma-glutamyl transpeptidase) | 0.5-5.3                                     | U/L   |
| CREAT (Creatinine)                   | 0.2-0.7                                     | mg/dl |

### References

1. Loeb, WF and Quimby, FW. 1999. The Clinical Chemistry of Laboratory Animals, 2nd ed. Philadelphia: Taylor & Francis USA
